# Supplementary material
Source: publisher figshare collection journal article supplement (https://springernature.figshare.com/ndownloader/files/13991759)
Supplement: Supplementary file [file 13991759]

## Additional file 2: Cs1 requirements to take large negative values

Rocio Joo

The Coefficient of Sociality (Cs) compares the mean distance between simultaneous pairs of fixes ( $D_O$ ) against the mean distance between all permutations of all fixes ( $D_E$ ).

$$Cs = \frac{D_E - D_O}{D_E + D_O} = 1 - 2\frac{D_O}{D_E + D_O}, \quad (1)$$

where

$$D_O = \left( \sum_{t=1}^T d_t^{A,B} \right) / T,$$

and

$$D_E = \left( \sum_{t_1=1}^T \sum_{t_2=1}^T d_{t_1, t_2}^{A,B} \right) / T^2.$$

Let  $d_{ij}$  be the distance between the locations of  $A$  at time  $i$  and  $B$  at time  $j$ . Then,  $D_O$  and  $D_E$  can be expressed as in equations 2 and 4.

$$D_O = \sum_{i=1}^T d_{ii} / T \quad (2)$$

$$D_E = \sum_{\substack{i, j \in [1, T] \\ i \neq j}} d_{ij} / (T^2 - T) \quad (3)$$

$$D_E = \frac{D_O}{T} + \frac{(T-1)}{T} D_{\bar{O}} \quad (4)$$

where  $D_{\bar{O}}$  is defined in equation 3 and corresponds to the average distance between the exclusively permuted points without taking into account the simultaneous fixes. Using those equations, we can replace  $D_O$  and  $D_E$  in equation 1 when  $Cs1 = -\alpha$  ( $\alpha > 0$ ) and obtain:

$$\frac{D_{\bar{O}}}{D_O} = \frac{T(1-\alpha)}{(T-1)(1+\alpha)} - \frac{1}{T-1} \quad (5)$$

It means that, for instance, for  $Cs1 = -0.5$  and when  $T$  is large,  $D_{\bar{O}}$  would have to be approximately a third of  $D_O$ , thus a third of the average distance computed only at simultaneous fixes. Fig. 1 shows the values of  $D_{\bar{O}}/D_O$  ratios needed to attain the whole range of Cs negative values. Most of those scenarios are very unlikely.

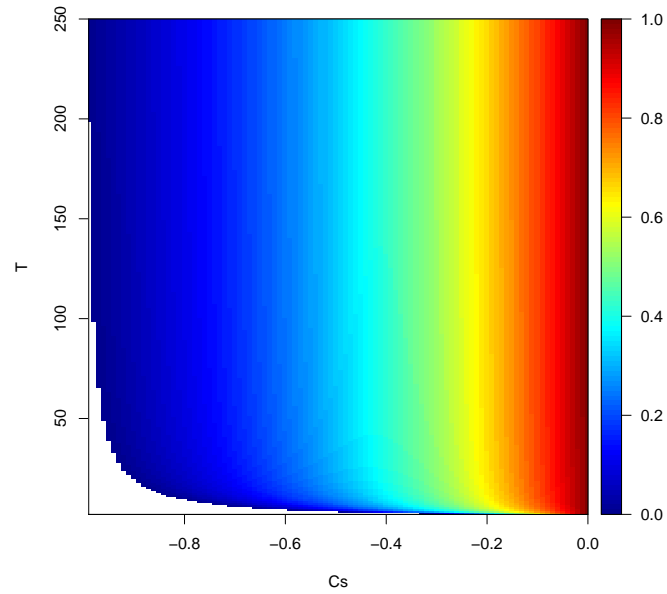

Figure 1: Computed ratios  $D_O/D_O$  needed for obtaining the Cs1 negative values (x-axis, from  $-0.99$  to  $0$ ) for each series length T (y-axis, from  $2$  to  $250$ ). The blank spaces correspond to infeasible situations.
